#### EDITORIAL NOTE

## Editorial Note: Investigating water movements around a shallow shipwreck in Big Tub Harbour of Lake Huron: Implications for managing and preserving underwater shipwrecks

The *PLOS One* Editors

The *PLOS One* Editors issue this Editorial Note because this article [1] was identified as one of a series of submissions for which we have concerns about aspects of the peer review process. Readers are advised to interpret the article [1] with caution.

The Editors have no evidence of any author involvement in the peer review concerns.

#### Reference

1. Flood B, Garihagama L, Wells MG, Valipour R, Semcesen P, Parker S. Investigating water movements around a shallow shipwreck in Big Tub Harbour of Lake Huron: Implications for managing and preserving underwater shipwrecks. *PLoS One*. 2023;18(1):e0279862. <https://doi.org/10.1371/journal.pone.0279862> PMID: [36595521](https://pubmed.ncbi.nlm.nih.gov/36595521/)

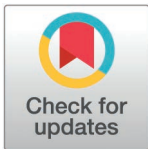

---

#### OPEN ACCESS

**Citation:** The *PLOS One* Editors (2026) Editorial Note: Investigating water movements around a shallow shipwreck in Big Tub Harbour of Lake Huron: Implications for managing and preserving underwater shipwrecks. *PLoS One* 21(5): e0348540. <https://doi.org/10.1371/journal.pone.0348540>

**Published:** May 5, 2026

**Copyright:** © 2026 The *PLOS One* Editors. This is an open access article distributed under the terms of the [Creative Commons Attribution License](https://creativecommons.org/licenses/by/4.0/), which permits unrestricted use, distribution, and reproduction in any medium, provided the original author and source are credited.
